# Supplementary material
Source: Springer Nature journal article supplement (https://www.springermedizin.de/resource/supplementary/12885_2013_3987_MOESM5_ESM.pdf/9464842)

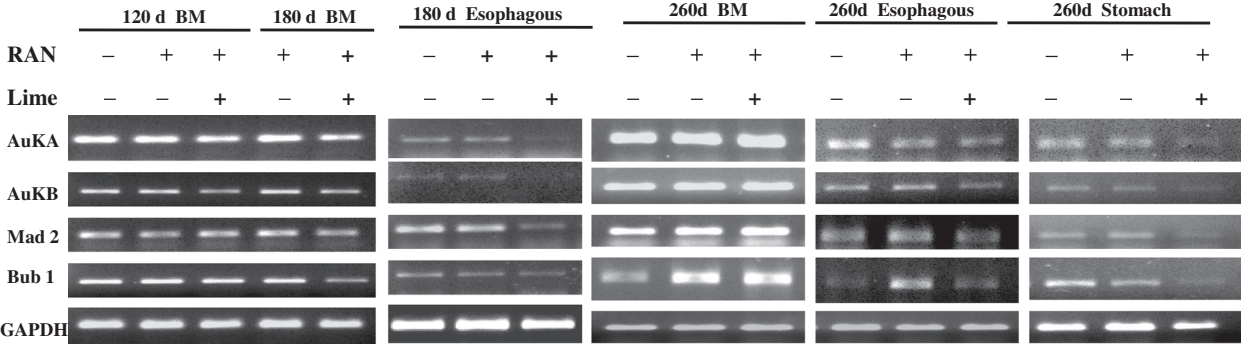

Control  
 RAN 260D  
 RAN+L 260D

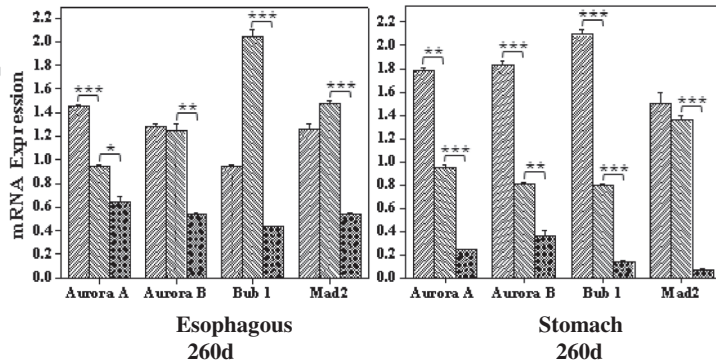

Supplement: MOESM5 [file 9464842]
